# Supplementary material for: Unveiling the Broad Substrate Specificity of Deoxynivalenol Oxidation Enzyme DepA and Its Role in Detoxifying Trichothecene Mycotoxins
Source: MDPI journal article supplement (doi:10.3390/toxins16030136), 2024-03-05
Supplement: s1 [file s1]

Supplementary Table S1A: Central composite rotational design matrix for evaluation of co-factors in DepA system

| Run | Levels of variable                                         |                                        |                                        |
|-----|------------------------------------------------------------|----------------------------------------|----------------------------------------|
|     | X <sub>1</sub> : DepA ( $\mu\text{g}\cdot\text{mL}^{-1}$ ) | X <sub>2</sub> : PQQ ( $\mu\text{M}$ ) | X <sub>3</sub> : PMS ( $\mu\text{M}$ ) |
| 1   | 9.0                                                        | 60                                     | 24                                     |
| 2   | 13.5                                                       | 90                                     | 36                                     |
| 3   | 9.0                                                        | 60                                     | 44.2                                   |
| 4   | 9.0                                                        | 60                                     | 24                                     |
| 5   | 9.0                                                        | 60                                     | 24                                     |
| 6   | 4.5                                                        | 30                                     | 12                                     |
| 7   | 4.5                                                        | 90                                     | 12                                     |
| 8   | 4.5                                                        | 90                                     | 36                                     |
| 9   | 9.0                                                        | 110.5                                  | 24                                     |
| 10  | 13.5                                                       | 90                                     | 12                                     |
| 11  | 13.5                                                       | 30                                     | 36                                     |
| 12  | 9.0                                                        | 60                                     | 24                                     |
| 13  | 4.5                                                        | 30                                     | 36                                     |
| 14  | 9.0                                                        | 9.5                                    | 24                                     |
| 15  | 13.5                                                       | 30                                     | 12                                     |
| 16  | 16.6                                                       | 60                                     | 24                                     |
| 17  | 9.0                                                        | 60                                     | 24                                     |
| 18  | 1.4                                                        | 60                                     | 24                                     |
| 19  | 9.0                                                        | 60                                     | 3.8                                    |
| 20  | 9.0                                                        | 60                                     | 24                                     |

Supplementary Table S1B: Experimental ranges and levels of independent variables for evaluation of co-factors in DepA system

| Variables                                 | Symbol         | Coded levels |     |     |      |        |
|-------------------------------------------|----------------|--------------|-----|-----|------|--------|
|                                           |                | -1.682       | -1  | 0   | +1   | +1.682 |
| DepA ( $\mu\text{g}\cdot\text{mL}^{-1}$ ) | X <sub>1</sub> | 1.4          | 4.5 | 9.0 | 13.5 | 16.6   |
| PQQ ( $\mu\text{M}$ )                     | X <sub>2</sub> | 9.5          | 30  | 60  | 90   | 110.5  |
| PMS ( $\mu\text{M}$ )                     | X <sub>3</sub> | 3.8          | 12  | 24  | 36   | 44.2   |

Supplementary Table S1C: ANOVA for quadratic model

| Source                        | Sum of Squares | df       | Mean Square | F-value      | p-value           |
|-------------------------------|----------------|----------|-------------|--------------|-------------------|
| <b>Model</b>                  | <b>85.74</b>   | <b>9</b> | <b>9.53</b> | <b>35.88</b> | <b>&lt;0.0001</b> |
| X <sub>1</sub> -DepA          | 43.13          | 1        | 43.13       | 162.40       | <0.0001           |
| X <sub>2</sub> -PQQ           | 21.27          | 1        | 21.27       | 80.08        | <0.0001           |
| X <sub>3</sub> -PMS           | 12.23          | 1        | 12.23       | 46.04        | <0.0001           |
| X <sub>1</sub> X <sub>2</sub> | 0.0490         | 1        | 0.0490      | 0.1844       | 0.6767            |
| X <sub>1</sub> X <sub>3</sub> | 0.3248         | 1        | 0.3248      | 1.22         | 0.2946            |
| X <sub>2</sub> X <sub>3</sub> | 0.0219         | 1        | 0.0219      | 0.0824       | 0.7799            |
| X <sub>1</sub> <sup>2</sup>   | 3.03           | 1        | 3.03        | 11.40        | 0.0070            |
| X <sub>2</sub> <sup>2</sup>   | 3.94           | 1        | 3.94        | 14.82        | 0.0032            |
| X <sub>3</sub> <sup>2</sup>   | 3.49           | 1        | 3.49        | 13.15        | 0.0046            |
